# Supplementary material for: Understanding the relationship between family planning method choices and modern contraceptive use: an analysis of geographically linked population and health facilities data in Haiti
Source: PubMed Central journal article supplement — BMJ Glob Health. 2019 Jul 1;4(Suppl 5):e000765. doi: 10.1136/bmjgh-2018-000765 (PMC6606068; doi:10.1136/bmjgh-2018-000765), 2019-07-01
Supplement: bmjgh-2018-000765supp001.pdf [file bmjgh-2018-000765supp001.pdf]

Supplementary Table. Percent distribution of married women age 15-49 in Haiti, by background characteristics and selected family planning characteristics

| Characteristics                  | Urban        |             | Rural        |             |
|----------------------------------|--------------|-------------|--------------|-------------|
|                                  | %            | N           | %            | N           |
| <b>Mother's age at birth</b>     |              |             |              |             |
| 15-24                            | 16.9         | 205         | 21.3         | 814         |
| 25-34                            | 43.9         | 534         | 36.2         | 1385        |
| 35-44                            | 29.3         | 356         | 28.9         | 1105        |
| 45-49                            | 9.9          | 121         | 13.6         | 522         |
| <b>Number of living children</b> |              |             |              |             |
| 0-1                              | 39.4         | 479         | 26.2         | 1004        |
| 2-3                              | 38.1         | 463         | 35.4         | 1355        |
| 4-5                              | 16.5         | 200         | 20.9         | 801         |
| 6+                               | 6.1          | 74          | 17.4         | 666         |
| <b>Mother's education</b>        |              |             |              |             |
| None                             | 11.0         | 134         | 34.0         | 1301        |
| Primary                          | 36.0         | 437         | 44.4         | 1700        |
| Secondary or higher              | 53.1         | 645         | 21.6         | 825         |
| <b>Occupation</b>                |              |             |              |             |
| Not employed                     | 28.1         | 342         | 32.6         | 1249        |
| Agriculture                      | 4.8          | 59          | 13.0         | 497         |
| Professional                     | 62.4         | 759         | 52.8         | 2021        |
| Other                            | 4.7          | 57          | 1.6          | 60          |
| <b>Wealth quintile</b>           |              |             |              |             |
| Lowest                           | 0.0          | 0           | 35.2         | 1345        |
| Second                           | 0.5          | 6           | 34.0         | 1299        |
| Middle                           | 22.8         | 278         | 20.5         | 786         |
| Fourth                           | 40.0         | 486         | 8.2          | 312         |
| Highest                          | 36.6         | 446         | 2.2          | 83          |
| <b>Department</b>                |              |             |              |             |
| Reste_Quest                      | 7.7          | 93          | 20.4         | 780         |
| Sud-est                          | 4.9          | 59          | 6.1          | 234         |
| Nord                             | 28.2         | 342         | 10.0         | 384         |
| Nord-est                         | 8.8          | 107         | 4.3          | 165         |
| Artibonite                       | 22.6         | 275         | 21.8         | 835         |
| Centre                           | 6.8          | 82          | 10.5         | 402         |
| Sud                              | 6.2          | 75          | 10.4         | 399         |
| Grand'anse                       | 5.0          | 61          | 5.1          | 194         |
| Nord-ouest                       | 7.7          | 94          | 6.4          | 243         |
| Nippes                           | 2.2          | 27          | 5.0          | 190         |
| <b>Religion</b>                  |              |             |              |             |
| Catholics                        | 43.7         | 532         | 41.8         | 1598        |
| Protestant                       | 50.6         | 615         | 47.3         | 1811        |
| Vaudousant/other                 | 5.7          | 70          | 10.9         | 417         |
| <b>Exposure to FP messages</b>   |              |             |              |             |
| No                               | 47.3         | 575         | 59.6         | 2281        |
| Yes                              | 52.7         | 641         | 40.4         | 1545        |
| <b>Contact with FP providers</b> |              |             |              |             |
| No                               | 70.3         | 855         | 68.4         | 2617        |
| Yes                              | 29.7         | 361         | 31.6         | 1209        |
| <b>Total</b>                     | <b>100.0</b> | <b>1216</b> | <b>100.0</b> | <b>3826</b> |

\* Condom is excluded
